# Supplementary material for: Pandemic Coronavirus Disease (COVID-19): Challenges and A Global Perspective
Source: Preprints.org preprint supplement (doi:10.20944/preprints202004.0469.v1), 2020-04-26
Supplement: Supplementary file 1 [file supplementary]

**Supplementary Table 1:** The functions of non-structural proteins in a typical coronavirus and SARS-CoV-2 (predicted by bioinformatics tools).

| <b>Non-Structural proteins</b> | <b>Functions of a typical CoV</b>                                                               | <b>SARS-CoV-2 (predicted by bioinformatics tools)</b>     |
|--------------------------------|-------------------------------------------------------------------------------------------------|-----------------------------------------------------------|
| nsp1                           | Cellular mRNA degradation, inhibiting IFN signaling                                             | Suppress antiviral host response                          |
| nsp2                           | Unknown                                                                                         | Unknown                                                   |
| nsp3                           | PLP, polypeptides cleaving, blocking host innate immune response, promoting cytokine expression | Putative PL-pro domain                                    |
| nsp4                           | DMV (double-membrane vesicle) formation                                                         | Complex with nsp3 and 6: DMV formation                    |
| nsp5                           | 3CLpro, Mpro, polypeptides cleaving, inhibiting IFN signaling                                   | 3CL-pro domain                                            |
| nsp6                           | Restricting autophagosome expansion, DMV formation                                              | Complex with nsp3 and 4: DMV formation                    |
| nsp7                           | Cofactor with nsp8 and nsp12                                                                    | Complex with nsp8: primase                                |
| nsp8                           | Cofactor with nsp7 and nsp12, primase                                                           | Complex with nsp7: primase                                |
| nsp9                           | Dimerization and RNA binding                                                                    | RNA/DNA binding activity                                  |
| nsp10                          | Scaffold protein for nsp14 and nsp16                                                            | Complex with nsp14: replication fidelity                  |
| nsp11                          | Unknown                                                                                         | Short peptide at the end of orf1a (2019-nCoV HKU-SZ-005b) |
| nsp12                          | Primer dependent RdRp                                                                           | RNA-dependent RNA polymerase                              |
| nsp13                          | RNA helicase, 5'triphosphatase                                                                  | Helicase                                                  |
| nsp14                          | Exoribonuclease, N7-MTase                                                                       | ExoN: 3'-5' exonuclease                                   |
| nsp15                          | Endoribonuclease, evasion of dsRNA sensors                                                      | XendoU: poly(U)-specific endoribonuclease                 |
| nsp16                          | 2'-O-MTase; avoiding MDA5 recognition, negatively regulating innate immunity                    | 2'-O-MT: 2'-O-ribose methyltransferase                    |
